# Supplementary material for: The German-Language Short Form of the Big Five Inventory for Children and Adolescents – Other-Rating Version (BFI-K KJ-F)
Source: Atypon-hosted journal article supplement (doi:10.1027/1015-5759/a000592), 2020-06-17
Supplement: 1015-5759_a000592_esm1.pdf [file 1015-5759_a000592_esm1.pdf]

*Electronic Supplementary Material 1*

*BFI-K KJ-F evaluation*

---

| E   | A  | C   | N  | O  |
|-----|----|-----|----|----|
| 3R  | 7  | 1   | 2  | 5  |
| 10R | 13 | 8R  | 4  | 6  |
| 19R | 20 | 11  | 15 | 9  |
|     | 23 | 14  | 18 | 12 |
|     | 25 | 17R | 22 | 16 |
|     | 26 | 21R |    | 24 |

---

*Note.* E = Extraversion, A = Agreeableness, C = Conscientiousness, N = Neuroticism, O = Openness to Experience; R = reverse coded item
