# Supplementary material for: The German-Language Short Form of the Big Five Inventory for Children and Adolescents – Other-Rating Version (BFI-K KJ-F)
Source: Atypon-hosted journal article supplement (doi:10.1027/1015-5759/a000592), 2020-06-17
Supplement: 1015-5759_a000592_esm3.pdf [file 1015-5759_a000592_esm3.pdf]

*Electronic Supplementary Material 3*

*Intercorrelations (partial correlations) of the BFI-K KJ-F scales*

---

| Scale | E | A    | C    | N     | O    |
|-------|---|------|------|-------|------|
| E     |   | .36* | -.05 | -.15  | .12  |
| A     |   |      | .04  | -.18* | .34* |
| C     |   |      |      | -.36* | .19* |
| N     |   |      |      |       | .03  |
| O     |   |      |      |       |      |

---

*Note.* E = Extraversion, A = Agreeableness, C = Conscientiousness, N = Neuroticism, O = Openness to Experience, \* significant after Bonferroni correction:  $p \leq .01$
