# Supplementary material for: The German-Language Short Form of the Big Five Inventory for Children and Adolescents – Other-Rating Version (BFI-K KJ-F)
Source: Atypon-hosted journal article supplement (doi:10.1027/1015-5759/a000592), 2020-06-17
Supplement: 1015-5759_a000592_esm4.pdf [file 1015-5759_a000592_esm4.pdf]

*Electronic Supplementary Material 4**Results of the one-way analyses of covariance regarding gender effects of the BFI-K KJ-F*

| Scale | Sample | <i>M</i> | <i>SE</i> | <i>F(df)</i>  | <i>p</i> | $\eta_p^2$ |
|-------|--------|----------|-----------|---------------|----------|------------|
| E     | Girls  | 2.10     | .09       | .001 (1, 255) | .972     | –          |
|       | Boys   | 2.11     | .09       |               |          |            |
| A     | Girls  | 2.92     | .05       | 3.37 (1, 255) | .068     | –          |
|       | Boys   | 2.79     | .05       |               |          |            |
| C     | Girls  | 2.39     | .07       | 8.50 (1, 255) | .004     | .03        |
|       | Boys   | 2.10     | .07       |               |          |            |
| N     | Girls  | 1.63     | .07       | .76 (1, 255)  | .385     | –          |
|       | Boys   | 1.55     | .07       |               |          |            |
| O     | Girls  | 2.72     | .06       | 7.96 (1, 255) | .005     | .03        |
|       | Boys   | 2.49     | .06       |               |          |            |

*Note.* E = Extraversion, A = Agreeableness, C = Conscientiousness, N = Neuroticism, O = Openness to Experience, *M* = mean value, *SE* = standard error, *F*-value with degrees of freedom (*df*), significance value *p* after Bonferroni correction:  $p \leq .01$ ,  $\eta_p^2$  = effect size; *N* = 258
