# Supplementary material for: The German-Language Short Form of the Big Five Inventory for Children and Adolescents – Other-Rating Version (BFI-K KJ-F)
Source: Atypon-hosted journal article supplement (doi:10.1027/1015-5759/a000592), 2020-06-17
Supplement: 1015-5759_a000592_esm5.pdf [file 1015-5759_a000592_esm5.pdf]

*Electronic Supplementary Material 5**Full Pearson product-moment correlation matrix of the self- and other-rating of the BFI-K KJ*

| Rating | Self  |       |      |       |      | Other |      |       |       |     |   |
|--------|-------|-------|------|-------|------|-------|------|-------|-------|-----|---|
|        | Scale | E     | A    | C     | N    | O     | E    | A     | C     | N   | O |
|        | E     |       |      |       |      |       |      |       |       |     |   |
|        | A     | .16   |      |       |      |       |      |       |       |     |   |
| Self   | C     | .11   | .11  |       |      |       |      |       |       |     |   |
|        | N     | -.27* | -.02 | -.29* |      |       |      |       |       |     |   |
|        | O     | .09   | .32* | .30*  | -.02 |       |      |       |       |     |   |
|        | E     | .45*  | .09  | -.02  | -.08 | .10   |      |       |       |     |   |
|        | A     | .30*  | .22* | -.02  | -.03 | .13   | .37* |       |       |     |   |
| Other  | C     | .03   | .03  | .56*  | -.11 | -.01  | -.06 | .03   |       |     |   |
|        | N     | -.07  | -.10 | -.11  | .43* | .12   | -.16 | -.20* | -.33* |     |   |
|        | O     | .14   | .11  | .15   | .02  | .50*  | .13  | .41*  | .19*  | .03 |   |

*Note.* E = Extraversion, A = Agreeableness, C = Conscientiousness, N = Neuroticism, O = Openness to Experience, \* significant after Bonferroni correction:  $p \leq .01$ ;  $n = 211$
