# Supplementary material for: The German-Language Short Form of the Big Five Inventory for Children and Adolescents – Other-Rating Version (BFI-K KJ-F)
Source: Atypon-hosted journal article supplement (doi:10.1027/1015-5759/a000592), 2020-06-17
Supplement: 1015-5759_a000592_esm6.pdf [file 1015-5759_a000592_esm6.pdf]

*Electronic Supplementary Material 6*

*Results of the scale mean comparisons between self- and other-rating of the BFI-K KJ (t-tests for dependent samples)*

| Scale | Sample | <i>M</i> | <i>SD</i> | <i>t(df)</i> | <i>p</i> |
|-------|--------|----------|-----------|--------------|----------|
| E     | Self   | 2.32     | 1.03      | 2.96 (210)   | < .01    |
|       | Other  | 2.10     | 1.02      |              |          |
| A     | Self   | 2.91     | 0.62      | 0.59 (210)   | .55      |
|       | Other  | 2.88     | 0.57      |              |          |
| C     | Self   | 2.44     | 0.76      | 3.75 (210)   | <.01     |
|       | Other  | 2.25     | 0.82      |              |          |
| N     | Self   | 1.54     | 0.85      | -0.08 (210)  | .94      |
|       | Other  | 1.55     | 0.80      |              |          |
| O     | Self   | 2.62     | 0.67      | 0.17 (210)   | .87      |
|       | Other  | 2.61     | 0.70      |              |          |

*Note.* E = Extraversion, A = Agreeableness, C = Conscientiousness, N = Neuroticism, O = Openness to Experience, *M* = mean value, *SD* = standard deviation, *t*-value with degrees of freedom (*df*), significance value *p* after Bonferroni correction:  $p \leq .01$ ;  $n = 211$
